# Supplementary material for: Transport and Recovery of Gilthead Seabream (Sparus aurata L.) Sedated With Clove Oil and MS-222: Effects on Stress Axis Regulation and Intermediary Metabolism
Source: PubMed Central journal article supplement (PMC6555194; doi:10.3389/fphys.2019.00612), 2019-05-31
Supplement: Data_Sheet_1.pdf [file Data_Sheet_1.pdf]

## SUPPLEMENTARY FILES

**Supplementary File 1.** Sedation, anesthesia and recovery stages defined for *S. aurata* during the exposure to clove oil (CO) and MS-222. Adapted from Ross and Ross (2008).

| <b>Induction Stage</b>  | <b>Description</b>                                                                |
|-------------------------|-----------------------------------------------------------------------------------|
| <i>Light Sedation</i>   | Partial loss of motion, active response to <i>stimuli</i>                         |
| <i>Deep Sedation</i>    | Erratic movements, ventilation decreased, response to <i>stimuli</i> reduced      |
| <i>Light Anesthesia</i> | Partial loss of equilibrium, analgesia                                            |
| <i>Deep Anesthesia</i>  | Total loss of equilibrium, no reaction to caudal press, ventilation almost ceased |
| <i>Recovery</i>         | Equilibrium, motion, and perception to <i>stimuli</i> completely restored         |

**Supplementary File 2.** Specific nucleotide sequences designed as primers for qPCR expression analysis, size of amplified products, concentration of primers used, and efficiencies ( $E$ , %) and  $R^2$  of curves assessed in *S. aurata*.

| Primers                     | Nucleotide Sequences           | Amplicon size (bp) | Concentration (nM) | Tissue      | $E$ (%) | $R^2$ |
|-----------------------------|--------------------------------|--------------------|--------------------|-------------|---------|-------|
| <i>actb</i> <sub>F</sub>    | 5'-TCTTCCAGCCATCCTTCCTCG-3'    | 108                | 200                | Brain       | 100.9   | 1.000 |
| <i>actb</i> <sub>R</sub>    | 5'-TGTTGGCATAACAGGTCCTTACGG-3' |                    |                    | Pituitary   | 94.8    | 0.998 |
|                             |                                |                    |                    | Head Kidney | 99.4    | 1.000 |
| <i>efla</i> <sub>F</sub>    | 5'-AGAGGCTGTCCCTGGTGA-3'       | 137                | 200                | Brain       | 102.8   | 0.999 |
| <i>efla</i> <sub>R</sub>    | 5'-TGATGACCTGAGCGTTGAAG-3'     |                    |                    | Pituitary   | 102.4   | 0.998 |
|                             |                                |                    |                    | Head Kidney | 97.7    | 0.999 |
| <i>crh</i> <sub>F</sub>     | 5'-GGAGCTTAAACGGGCTTGAC-3'     | 97                 | 200                | Brain       | 91.3    | 0.999 |
| <i>crh</i> <sub>R</sub>     | 5'-TCAAACATGAAGAACGGCTTAA-3'   |                    |                    |             |         |       |
| <i>crhbp</i> <sub>F</sub>   | 5'-TTTGAAGAGCCACAGATCCA-3'     | 171                | 200                | Brain       | 96.1    | 0.994 |
| <i>crhbp</i> <sub>R</sub>   | 5'-TCGAGCTTTATTCAGCGACA-3'     |                    |                    |             |         |       |
| <i>trh</i> <sub>F</sub>     | 5'-GAAACGCTTTTGGGATAACTCC-3'   | 131                | 300                | Brain       | 108.1   | 0.999 |
| <i>trh</i> <sub>R</sub>     | 5'-CGGCGTGACTCTTGTTTATGTT-3'   |                    |                    |             |         |       |
| <i>pomca1</i> <sub>F</sub>  | 5'-AGCCAGAAGAGAGAGCAGTGAT-3'   | 120                | 400                | Pituitary   | 101.6   | 1.000 |
| <i>pomca1</i> <sub>R</sub>  | 5'-ATCGGGTCAGAAAACACTCA-3'     |                    |                    |             |         |       |
| <i>pomca2</i> <sub>F</sub>  | 5'-AGCTCGCCAGTGAGCTGT-3'       | 81                 | 600                | Pituitary   | 99.4    | 1.000 |
| <i>pomca2</i> <sub>R</sub>  | 5'-CCTCCTGCATCACTTCCTG-3'      |                    |                    |             |         |       |
| <i>star</i> <sub>F</sub>    | 5'-GAGCACAGATGTTGGCTTCA-3'     | 103                | 300                | Head Kidney | 101.1   | 0.999 |
| <i>star</i> <sub>R</sub>    | 5'-GAAACAATCGAGGCACACAA-3'     |                    |                    |             |         |       |
| <i>cyp11b1</i> <sub>F</sub> | 5'-GCTCTGACGCACACTGAGAA-3'     | 135                | 200                | Head Kidney | 106.5   | 0.997 |
| <i>cyp11b1</i> <sub>R</sub> | 5'-ATGAGGAAGCCACAATAACAGC-3'   |                    |                    |             |         |       |
| <i>nr3c1</i> <sub>F</sub>   | 5'-TGCTGGCGGAGATCATCACCA-3'    | 182                | 200                | Head Kidney | 93.8    | 0.999 |
| <i>nr3c1</i> <sub>R</sub>   | 5'-GCAGGCCAAGCGAAGGCTTA-3'     |                    |                    |             |         |       |

**Supplementary File 3.** *P-Values* from two-way ANOVA of parameters measured *S. aurata* juveniles. Anesthetics addition during transport (none, clove oil or MS-222), and sampling time (after 6 h of transport or after 18 h of recovery) were considered as factors of variation (n.s., not significant).

| Tissue      | Parameter                 | Anesthetic | Time     | Anesthetic x Time |
|-------------|---------------------------|------------|----------|-------------------|
| Brain       | <i>crh</i> expression     | n.s.       | n.s.     | n.s.              |
|             | <i>crhbp</i> expression   | n.s.       | n.s.     | n.s.              |
|             | <i>trh</i> expression     | n.s.       | n.s.     | n.s.              |
| Pituitary   | <i>pomca1</i> expression  | n.s.       | n.s.     | n.s.              |
|             | <i>pomca2</i> expression  | n.s.       | n.s.     | n.s.              |
| Head Kidney | <i>star</i> expression    | n.s.       | n.s.     | 0.0007            |
|             | <i>cyp11b1</i> expression | n.s.       | n.s.     | 0.0027            |
|             | <i>nr3c1</i> expression   | n.s.       | 0.0058   | n.s.              |
| Plasma      | Cortisol levels           | 0.0077     | 0.0031   | n.s.              |
|             | Glucose levels            | n.s.       | 0.0006   | n.s.              |
|             | Lactate levels            | n.s.       | < 0.0001 | n.s.              |
|             | TAG levels                | n.s.       | <0.0001  | 0.0068            |
|             | Proteins levels           | n.s.       | n.s.     | n.s.              |
|             | Amino acids levels        | 0.0041     | 0.0158   | n.s.              |
|             | Ammonia levels            | n.s.       | n.s.     | n.s.              |
|             | Osmolality                | n.s.       | < 0.0001 | n.s.              |
| Liver       | Glycogen levels           | n.s.       | 0.02     | n.s.              |
|             | Free glucose levels       | n.s.       | n.s.     | n.s.              |
|             | TAG levels                | n.s.       | n.s.     | n.s.              |
|             | Amino acids levels        | n.s.       | n.s.     | n.s.              |
|             | GP activity               | < 0.0001   | < 0.0001 | < 0.0001          |
|             | PK activity               | n.s.       | 0.0059   | 0.0237            |
|             | LDH-o activity            | n.s.       | n.s.     | n.s.              |
|             | FBP activity              | n.s.       | n.s.     | n.s.              |
|             | ALT activity              | n.s.       | < 0.0001 | n.s.              |
|             | AST activity              | n.s.       | n.s.     | n.s.              |
|             | GLDH activity             | 0.0008     | 0.0005   | n.s.              |
|             | G6PDH activity            | 0.0023     | n.s.     | 0.0053            |
|             | GPDH activity             | n.s.       | 0.0084   | n.s.              |
|             | HADH activity             | 0.0420     | 0.0251   | n.s.              |
| Gills       | NKA activity              | n.s.       | 0.0438   | n.s.              |
